# Supplementary material for: The variables associated with dental anxiety and their management in primary care dental clinics in Bahrain: a cross-sectional study
Source: PubMed Central journal article supplement (PMC9026669; doi:10.1186/s12903-022-02173-7), 2022-04-21
Supplement: 12903_2022_2173_MOESM1_ESM.pdf [file 12903_2022_2173_MOESM1_ESM.pdf]

## Supplementary Table 1: STROBE Statement—checklist of items

|                              | Item No. | Recommendation                                                                                                                                                                                                                                                                                                                                                                                                                                 | Page No. |
|------------------------------|----------|------------------------------------------------------------------------------------------------------------------------------------------------------------------------------------------------------------------------------------------------------------------------------------------------------------------------------------------------------------------------------------------------------------------------------------------------|----------|
| <b>Title and abstract</b>    | 1        | (a) Indicate the study's design with a commonly used term in the title or the abstract                                                                                                                                                                                                                                                                                                                                                         | Page 1,2 |
|                              |          | (b) Provide in the abstract an informative and balanced summary of what was done and what was found                                                                                                                                                                                                                                                                                                                                            | Page 3,4 |
| <b>Introduction</b>          |          |                                                                                                                                                                                                                                                                                                                                                                                                                                                |          |
| Background/rationale         | 2        | Explain the scientific background and rationale for the investigation being reported                                                                                                                                                                                                                                                                                                                                                           | Page 7   |
| Objectives                   | 3        | State specific objectives, including any prespecified hypotheses                                                                                                                                                                                                                                                                                                                                                                               | Page 7   |
| <b>Methods</b>               |          |                                                                                                                                                                                                                                                                                                                                                                                                                                                |          |
| Study design                 | 4        | Present key elements of study design early in the paper                                                                                                                                                                                                                                                                                                                                                                                        | Page 8   |
| Setting                      | 5        | Describe the setting, locations, and relevant dates, including periods of recruitment, exposure, follow-up, and data collection                                                                                                                                                                                                                                                                                                                | Page 8,9 |
| Participants                 | 6        | (a) Cohort study—Give the eligibility criteria, and the sources and methods of selection of participants. Describe methods of follow-up<br>Case-control study—Give the eligibility criteria, and the sources and methods of case ascertainment and control selection. Give the rationale for the choice of cases and controls<br>Cross-sectional study—Give the eligibility criteria, and the sources and methods of selection of participants | Page 8   |
|                              |          | (b) Cohort study—For matched studies, give matching criteria and number of exposed and unexposed<br>Case-control study—For matched studies, give matching criteria and the number of controls per case                                                                                                                                                                                                                                         |          |
| Variables                    | 7        | Clearly define all outcomes, exposures, predictors, potential confounders, and effect modifiers. Give diagnostic criteria, if applicable                                                                                                                                                                                                                                                                                                       | Page 9   |
| Data sources/<br>measurement | 8*       | For each variable of interest, give sources of data and details of methods of assessment (measurement). Describe comparability of assessment methods if there is more than one group                                                                                                                                                                                                                                                           | Page 9   |
| Bias                         | 9        | Describe any efforts to address potential sources of bias                                                                                                                                                                                                                                                                                                                                                                                      | Page 9   |
| Study size                   | 10       | Explain how the study size was arrived at                                                                                                                                                                                                                                                                                                                                                                                                      | Page 9   |

Continued on next page

|                        |     |                                                                                                                                                                                                                                                                                   |               |
|------------------------|-----|-----------------------------------------------------------------------------------------------------------------------------------------------------------------------------------------------------------------------------------------------------------------------------------|---------------|
| Quantitative variables | 11  | Explain how quantitative variables were handled in the analyses. If applicable, describe which groupings were chosen and why                                                                                                                                                      | Page 9,10     |
| Statistical methods    | 12  | (a) Describe all statistical methods, including those used to control for confounding                                                                                                                                                                                             | Page 9        |
|                        |     | (b) Describe any methods used to examine subgroups and interactions                                                                                                                                                                                                               | NA            |
|                        |     | (c) Explain how missing data were addressed                                                                                                                                                                                                                                       | NA            |
|                        |     | (d) Cohort study—If applicable, explain how loss to follow-up was addressed<br>Case-control study—If applicable, explain how matching of cases and controls was addressed<br>Cross-sectional study—If applicable, describe analytical methods taking account of sampling strategy | Page 9        |
|                        |     | (e) Describe any sensitivity analyses                                                                                                                                                                                                                                             | NA            |
| <b>Results</b>         |     |                                                                                                                                                                                                                                                                                   |               |
| Participants           | 13* | (a) Report numbers of individuals at each stage of study—eg numbers potentially eligible, examined for eligibility, confirmed eligible, included in the study, completing follow-up, and analysed                                                                                 | Page 11       |
|                        |     | (b) Give reasons for non-participation at each stage                                                                                                                                                                                                                              | NA            |
|                        |     | (c) Consider use of a flow diagram                                                                                                                                                                                                                                                | NA            |
| Descriptive data       | 14* | (a) Give characteristics of study participants (eg demographic, clinical, social) and information on exposures and potential confounders                                                                                                                                          | Page 11       |
|                        |     | (b) Indicate number of participants with missing data for each variable of interest                                                                                                                                                                                               | NA            |
|                        |     | (c) Cohort study—Summarise follow-up time (eg, average and total amount)                                                                                                                                                                                                          | NA            |
| Outcome data           | 15* | Cohort study—Report numbers of outcome events or summary measures over time                                                                                                                                                                                                       |               |
|                        |     | Case-control study—Report numbers in each exposure category, or summary measures of exposure                                                                                                                                                                                      |               |
|                        |     | Cross-sectional study—Report numbers of outcome events or summary measures                                                                                                                                                                                                        | Page 11,12,13 |
| Main results           | 16  | (a) Give unadjusted estimates and, if applicable, confounder-adjusted estimates and their precision (eg, 95% confidence interval). Make clear which confounders were adjusted for and why they were included                                                                      | Table 1,2,3,4 |
|                        |     | (b) Report category boundaries when continuous variables were categorized                                                                                                                                                                                                         | Table 1,2,3,4 |
|                        |     | (c) If relevant, consider translating estimates of relative risk into absolute risk for a meaningful time period                                                                                                                                                                  | NA            |

Continued on next page

|                          |    |                                                                                                                                                                            |               |
|--------------------------|----|----------------------------------------------------------------------------------------------------------------------------------------------------------------------------|---------------|
| Other analyses           | 17 | Report other analyses done—eg analyses of subgroups and interactions, and sensitivity analyses                                                                             | NA            |
| <b>Discussion</b>        |    |                                                                                                                                                                            |               |
| Key results              | 18 | Summarise key results with reference to study objectives                                                                                                                   | Page 14       |
| Limitations              | 19 | Discuss limitations of the study, taking into account sources of potential bias or imprecision. Discuss both direction and magnitude of any potential bias                 | Page 16       |
| Interpretation           | 20 | Give a cautious overall interpretation of results considering objectives, limitations, multiplicity of analyses, results from similar studies, and other relevant evidence | Page 14,15,16 |
| Generalisability         | 21 | Discuss the generalisability (external validity) of the study results                                                                                                      | Page 16       |
| <b>Other information</b> |    |                                                                                                                                                                            |               |
| Funding                  | 22 | Give the source of funding and the role of the funders for the present study and, if applicable, for the original study on which the present article is based              | Page 17       |
